# Supplementary material for: An Evolutionarily Conserved Synthetic Lethal Interaction Network Identifies FEN1 as a Broad-Spectrum Target for Anticancer Therapeutic Development
Source: PLoS Genet. 2013 Jan 31;9(1):e1003254. doi: 10.1371/journal.pgen.1003254 (PMC3561056; doi:10.1371/journal.pgen.1003254)
Supplement: Table S5 — Genetic interactors of rad27Δ and cancer mutations. (XLS) [file pgen.1003254.s008.xls]

## Sheet: Supplementary Table S5
Supplementary Table S5. Genetic interactors of rad27D and cancer mutations.
ORF name	Gene name	Source 1	Source 2	Source 3	Human ortholog gene name	COSMIC mutated?	Cancer census?
YGR188C	BUB1	BioGRID1			BUB1B	y	y
YLR418C	CDC73	BioGRID			CDC73	y	y
YPL008W	CHL1	BioGRID	DRYGIN2		BRIP1	y	y
YKL139W	CTK1	BioGRID			CDK12	y	y
YNL030W	HHF2	BioGRID			HIST1H4I	y	y
YBR010W	HHT1	BioGRID			H3F3A	y	y
YNL031C	HHT2	BioGRID			H3F3A	y	y
YOL090W	MSH2	BioGRID	DRYGIN		MSH2	y	y
YDR432W	NPL3	BioGRID			FUS	y	y
YDR432W	NPL3	BioGRID			TAF15	y	y
YDR432W	NPL3	BioGRID			EWSR1	y	y
YJL128C	PBS2	BioGRID	DRYGIN		MAP2K4	y	y
YPL022W	RAD1	BioGRID			ERCC4	y	y
YER171W	RAD3	BioGRID			ERCC2	y	y
YER095W	RAD51	BioGRID	DRYGIN		RAD51B	y	y
YPL153C	RAD53	BioGRID			CHEK2	y	y
YGL163C	RAD54	BioGRID	DRYGIN		ATRX	y	y
YNL098C	RAS2	BioGRID	DRYGIN		NRAS	y	y
YNL098C	RAS2	BioGRID	DRYGIN		HRAS	y	y
YNL098C	RAS2	BioGRID	DRYGIN		KRAS	y	y
YER129W	SAK1	DRYGIN			STK11	y	y
YLR321C	SFH1	This study			SMARCB1	y	y
YMR190C	SGS1	BioGRID	DRYGIN		BLM	y	y
YMR190C	SGS1	BioGRID	DRYGIN		WRN	y	y
YOL006C	TOP1	BioGRID			TOP1	y	y
YNL079C	TPM1	DRYGIN			TPM3	y	y
YNL079C	TPM1	DRYGIN			TPM4	y	y
YKR001C	VPS1	BioGRID			DNM2	y	y
YLR403W	SFP1	BioGRID			JAZF1	n	y
YLR027C	AAT2	BioGRID			GOT2	y	n
YLR027C	AAT2	BioGRID			GOT1	y	n
YLR027C	AAT2	BioGRID			GOT1L1	y	n
YJL046W	AIM22	DRYGIN			LIPT1	y	n
YML087C	AIM33	BioGRID	DRYGIN		CYB5R4	y	n
YLR370C	ARC18	BioGRID	DRYGIN		ARPC3	y	n
YHR013C	ARD1	BioGRID	DRYGIN		NAA10	y	n
YHR013C	ARD1	BioGRID	DRYGIN		NAA11	y	n
YJL081C	ARP4	BioGRID			ACTL6B	y	n
YJL081C	ARP4	BioGRID			ACTL6A	y	n
YLR085C	ARP6	BioGRID			ACTR6	y	n
YLR085C	ARP6	BioGRID			ACTR5	y	n
YOR141C	ARP8	BioGRID			ACTR8	y	n
YJL115W	ASF1	BioGRID			ASF1A	y	n
YJL115W	ASF1	BioGRID			ASF1B	y	n
YLR114C	AVL9	DRYGIN			AVL9	y	n
YBL089W	AVT5	BioGRID	DRYGIN		SLC38A7	y	n
YBL089W	AVT5	BioGRID			SLC38A8	y	n
YPR176C	BET2	This study			RABGGTB	y	n
YPR176C	BET2	This study			PGGT1B	y	n
YER016W	BIM1	BioGRID			MAPRE3	y	n
YER016W	BIM1	BioGRID			MAPRE1	y	n
YER016W	BIM1	BioGRID			MAPRE2	y	n
YDL074C	BRE1	BioGRID	DRYGIN		RNF40	y	n
YDL074C	BRE1	BioGRID	DRYGIN		RNF20	y	n
YPL084W	BRO1	BioGRID			RHPN1	y	n
YPL084W	BRO1	BioGRID			RHPN2	y	n
YDR252W	BTT1	DRYGIN			BTF3	y	n
YDR252W	BTT1	DRYGIN			BTF3L4	y	n
YGR188C	BUB1	BioGRID			BUB1	y	n
YGR262C	BUD32	BioGRID	DRYGIN		TP53RK	y	n
YML102W	CAC2	BioGRID	DRYGIN		CHAF1B	y	n
YAL021C	CCR4	BioGRID			CNOT6L	y	n
YAL021C	CCR4	BioGRID			CNOT6	y	n
YAL021C	CCR4	BioGRID			ANGEL1	y	n
YAL021C	CCR4	BioGRID			ANGEL2	y	n
YAL021C	CCR4	BioGRID			CCRN4L	y	n
YAL021C	CCR4	BioGRID			PDE12	y	n
YGL116W	CDC20	BioGRID			CDC20	y	n
YGL116W	CDC20	BioGRID			CDC20B	y	n
YHR166C	CDC23	This study			CDC23	y	n
YOL139C	CDC33	This study			EIF4E1B	y	n
YOL139C	CDC33	This study			EIF4E2	y	n
YOL139C	CDC33	This study			EIF4E	y	n
YOL139C	CDC33	This study			EIF4E3	y	n
YDL165W	CDC36	This study			CNOT2	y	n
YLR229C	CDC42	This study			CDC42	y	n
YLR229C	CDC42	This study			RHOQ	y	n
YLR229C	CDC42	This study			RHOJ	y	n
YGL190C	CDC55	BioGRID			PPP2R2A	y	n
YGL190C	CDC55	BioGRID			PPP2R2B	y	n
YGL190C	CDC55	BioGRID			PPP2R2D	y	n
YGL190C	CDC55	BioGRID			PPP2R2C	y	n
YJR057W	CDC8	BioGRID	DRYGIN		DTYMK	y	n
YDL164C	CDC9	BioGRID			LIG1	y	n
YDL164C	CDC9	BioGRID			LIG3	y	n
YGL003C	CDH1	BioGRID	DRYGIN		FZR1	y	n
YPL008W	CHL1	BioGRID	DRYGIN		DDX11	y	n
YPL008W	CHL1	BioGRID	DRYGIN		RTEL1	y	n
YPL008W	CHL1	BioGRID	DRYGIN		RTEL1	y	n
YOR039W	CKB2	BioGRID	DRYGIN		CSNK2B	y	n
YOR039W	CKB2	BioGRID	DRYGIN		XXbac-BPG32J3.22	y	n
YNL298W	CLA4	BioGRID			PAK6	y	n
YNL298W	CLA4	BioGRID			PAK7	y	n
YNL298W	CLA4	BioGRID			PAPD7	y	n
YPR120C	CLB5	BioGRID			CCNB1	y	n
YPR120C	CLB5	BioGRID			CCNB2	y	n
YPR120C	CLB5	BioGRID			CCNB3	y	n
YPR120C	CLB5	BioGRID			CCNA1	y	n
YPR120C	CLB5	BioGRID			CCNA2	y	n
YPR120C	CLB5	BioGRID			CCNO	y	n
YOR316C	COT1	BioGRID	DRYGIN		SLC30A1	y	n
YOR316C	COT1	BioGRID	DRYGIN		SLC30A10	y	n
YOR316C	COT1	BioGRID	DRYGIN		SLC30A4	y	n
YOR316C	COT1	BioGRID	DRYGIN		SLC30A2	y	n
YOR316C	COT1	BioGRID	DRYGIN		SLC30A3	y	n
YOR316C	COT1	BioGRID	DRYGIN		SLC30A8	y	n
YHR051W	COX6	DRYGIN			COX5A	y	n
YMR078C	CTF18	BioGRID			CHTF18	y	n
YPR135W	CTF4	BioGRID	DRYGIN		WDHD1	y	n
YKL139W	CTK1	BioGRID			CDK11B	y	n
YKL139W	CTK1	BioGRID			CDK11A	y	n
YKL139W	CTK1	BioGRID			CDK10	y	n
YKL139W	CTK1	BioGRID			CDK13	y	n
YKL139W	CTK1	BioGRID			CDK9	y	n
YBR112C	CYC8	DRYGIN			SETD5	y	n
YBR112C	CYC8	DRYGIN			MLL5	y	n
YKL149C	DBR1	BioGRID			DBR1	y	n
YCL016C	DCC1	BioGRID			DSCC1	y	n
YOR173W	DCS2	BioGRID	DRYGIN		DCPS	y	n
YHR164C	DNA2	BioGRID			DNA2	y	n
YKL213C	DOA1	BioGRID	DRYGIN		PLAA	y	n
YDR069C	DOA4	BioGRID			USP8	y	n
YDR069C	DOA4	BioGRID			USP50	y	n
YDR069C	DOA4	BioGRID			USP36	y	n
YDR069C	DOA4	BioGRID			USP42	y	n
YDR069C	DOA4	BioGRID			USP17L2	y	n
YDR069C	DOA4	BioGRID			RP11-1286E23.18	y	n
YDR069C	DOA4	BioGRID			RP11-1286E23.5	y	n
YDR069C	DOA4	BioGRID			RP11-1396O13.5	y	n
YDR069C	DOA4	BioGRID			RP11-1396O13.7	y	n
YDR069C	DOA4	BioGRID			RP11-1396O13.4	y	n
YDR069C	DOA4	BioGRID			USP17L5	y	n
YDR069C	DOA4	BioGRID			USP17	y	n
YDR069C	DOA4	BioGRID			RP11-1396O13.11	y	n
YDR069C	DOA4	BioGRID			RP11-1396O13.9	y	n
YDR069C	DOA4	BioGRID			RP11-1396O13.8	y	n
YDR069C	DOA4	BioGRID			RP11-1286E23.6	y	n
YDR069C	DOA4	BioGRID			RP11-1286E23.15	y	n
YDR069C	DOA4	BioGRID			RP11-1286E23.17	y	n
YDR069C	DOA4	BioGRID			RP11-1286E23.10	y	n
YDR069C	DOA4	BioGRID			RP11-1286E23.14	y	n
YDR069C	DOA4	BioGRID			RP11-1286E23.13	y	n
YDR069C	DOA4	BioGRID			RP11-1286E23.7	y	n
YDR069C	DOA4	BioGRID			RP11-1286E23.16	y	n
YDR069C	DOA4	BioGRID			RP11-1286E23.8	y	n
YDR069C	DOA4	BioGRID			RP11-1286E23.12	y	n
YGL240W	DOC1	BioGRID			ANAPC10	y	n
YDR440W	DOT1	BioGRID			DOT1L	y	n
YDL101C	DUN1	BioGRID			PHKG2	y	n
YDL101C	DUN1	BioGRID			PHKG1	y	n
YPR023C	EAF3	BioGRID			MORF4L1	y	n
YPR023C	EAF3	BioGRID			MORF4L2	y	n
YPR023C	EAF3	BioGRID			MSL3	y	n
YPL236C	ENV7	BioGRID			STK16	y	n
YLR056W	ERG3	BioGRID			SC5DL	y	n
YGR284C	ERV29	DRYGIN			SURF4	y	n
YOR244W	ESA1	BioGRID			KAT8	y	n
YOR244W	ESA1	BioGRID			KAT6B	y	n
YOR244W	ESA1	BioGRID			KAT7	y	n
YOR244W	ESA1	BioGRID			KAT6A	y	n
YOR033C	EXO1	BioGRID	DRYGIN		EXO1	y	n
YFR019W	FAB1	BioGRID			PIKFYVE	y	n
YFR019W	FAB1	BioGRID			ZFYVE21	y	n
YFR019W	FAB1	BioGRID			ZFYVE28	y	n
YNL127W	FAR11	DRYGIN			FAM40A	y	n
YNL127W	FAR11	DRYGIN			FAM40B	y	n
YBL016W	FUS3	BioGRID			MAPK1	y	n
YBL016W	FUS3	BioGRID			MAPK7	y	n
YBL016W	FUS3	BioGRID			NLK	y	n
YBL016W	FUS3	BioGRID			MAPK6	y	n
YBL016W	FUS3	BioGRID			MAPK4	y	n
YBL016W	FUS3	BioGRID			MAPK15	y	n
YLR459W	GAB1	This study			PIGU	y	n
YDL100C	GET3	DRYGIN			ASNA1	y	n
YHR108W	GGA2	DRYGIN			GGA3	y	n
YHR108W	GGA2	DRYGIN			GGA1	y	n
YHR108W	GGA2	DRYGIN			TOM1	y	n
YHR108W	GGA2	DRYGIN			TOM1L2	y	n
YHR108W	GGA2	DRYGIN			GGA2	y	n
YHR108W	GGA2	DRYGIN			TOM1L1	y	n
YER133W	GLC7	This study			PPP1CA	y	n
YER133W	GLC7	This study			PPP1CB	y	n
YER133W	GLC7	This study			PPP1CC	y	n
YJR090C	GRR1	BioGRID			AMN1	y	n
YJR090C	GRR1	BioGRID			FBXL14	y	n
YJR090C	GRR1	BioGRID			FBXL16	y	n
YJR090C	GRR1	BioGRID			AC040160.1	y	n
YJR090C	GRR1	BioGRID			FBXL15	y	n
YJR090C	GRR1	BioGRID			LRRC29	y	n
YLR289W	GUF1	BioGRID			GUF1	y	n
YGL040C	HEM2	BioGRID	DRYGIN		ALAD	y	n
YNL030W	HHF2	BioGRID			HIST1H4G	y	n
YNL030W	HHF2	BioGRID			HIST1H4K	y	n
YNL030W	HHF2	BioGRID			HIST1H4D	y	n
YBR010W	HHT1	BioGRID			H3F3C	y	n
YBR010W	HHT1	BioGRID			H3F3B	y	n
YBR010W	HHT1	BioGRID			HIST3H3	y	n
YNL031C	HHT2	BioGRID			H3F3C	y	n
YNL031C	HHT2	BioGRID			H3F3B	y	n
YNL031C	HHT2	BioGRID			HIST3H3	y	n
YBL008W	HIR1	BioGRID			HIRA	y	n
YOR258W	HNT3	BioGRID			APTX	y	n
YOR258W	HNT3	BioGRID			PNKP	y	n
YLR113W	HOG1	BioGRID	DRYGIN		MAPK14	y	n
YLR113W	HOG1	BioGRID	DRYGIN		MAPK11	y	n
YLR113W	HOG1	BioGRID	DRYGIN		MAPK10	y	n
YLR113W	HOG1	BioGRID	DRYGIN		MAPK8	y	n
YLR113W	HOG1	BioGRID	DRYGIN		MAPK9	y	n
YOL068C	HST1	BioGRID			SIRT1	y	n
YOL012C	HTZ1	BioGRID			H2AFV	y	n
YNR072W	HXT17	DRYGIN			SLC2A8	y	n
YNR072W	HXT17	DRYGIN			SLC2A6	y	n
YNL106C	INP52	BioGRID			SYNJ1	y	n
YNL106C	INP52	BioGRID			SYNJ2	y	n
YNL106C	INP52	BioGRID			INPP5E	y	n
YER019W	ISC1	BioGRID			SMPD2	y	n
YAR018C	KIN3	BioGRID			NEK2	y	n
YAR018C	KIN3	BioGRID			NEK1	y	n
YAR018C	KIN3	BioGRID			NEK5	y	n
YAR018C	KIN3	BioGRID			NEK11	y	n
YAR018C	KIN3	BioGRID			NEK3	y	n
YMR296C	LCB1	BioGRID	DRYGIN		SPTLC1	y	n
YJL124C	LSM1	BioGRID			NAA38	y	n
YJL124C	LSM1	BioGRID			TRMT61A	y	n
YBR202W	MCM7	This study			MCM7	y	n
YBR227C	MCX1	BioGRID	DRYGIN		CLPX	y	n
YBR136W	MEC1	BioGRID			ATR	y	n
YBR136W	MEC1	BioGRID			PRKDC	y	n
YMR224C	MRE11	BioGRID	DRYGIN		MRE11A	y	n
YDR386W	MUS81	BioGRID	DRYGIN		MUS81	y	n
YDL040C	NAT1	BioGRID			NAA15	y	n
YDL040C	NAT1	BioGRID			NAA16	y	n
YBL024W	NCL1	DRYGIN			NSUN2	y	n
YDR456W	NHX1	BioGRID			SLC9A6	y	n
YDR456W	NHX1	BioGRID			SLC9A7	y	n
YDR456W	NHX1	BioGRID			SLC9A9	y	n
YDR456W	NHX1	BioGRID			SLC9A8	y	n
YDR456W	NHX1	BioGRID			SLC9A3	y	n
YPR144C	NOC4	This study			NOC4L	y	n
YDL105W	NSE4	This study			NSMCE4A	y	n
YDL105W	NSE4	This study			EID3	y	n
YDL116W	NUP84	BioGRID			NUP107	y	n
YJR073C	OPI3	BioGRID			PEMT	y	n
YBR060C	ORC2	This study	BioGRID	DRYGIN	ORC2	y	n
YLR350W	ORM2	BioGRID			ORMDL1	y	n
YOL115W	PAP2	BioGRID			PAPD7	y	n
YJL128C	PBS2	BioGRID	DRYGIN		MAP2K1	y	n
YJL128C	PBS2	BioGRID	DRYGIN		MAP2K5	y	n
YJL128C	PBS2	BioGRID	DRYGIN		MAP2K7	y	n
YJL128C	PBS2	BioGRID	DRYGIN		MAP2K6	y	n
YLR148W	PEP3	BioGRID			VPS18	y	n
YDR323C	PEP7	BioGRID			ZFYVE20	y	n
YNL097C	PHO23	BioGRID	DRYGIN		ING4	y	n
YNL097C	PHO23	BioGRID	DRYGIN		ING5	y	n
YNL097C	PHO23	BioGRID	DRYGIN		ING3	y	n
YNL097C	PHO23	BioGRID	DRYGIN		ING2	y	n
YNL097C	PHO23	BioGRID	DRYGIN		ING1	y	n
YGL167C	PMR1	BioGRID	DRYGIN		ATP2C1	y	n
YGL167C	PMR1	BioGRID	DRYGIN		ATP2C2	y	n
YGL167C	PMR1	BioGRID	DRYGIN		ATP2A1	y	n
YGL167C	PMR1	BioGRID	DRYGIN		ATP2A2	y	n
YDL102W	POL3	BioGRID	DRYGIN		POLD1	y	n
YBR088C	POL30	This study	BioGRID		PCNA	y	n
YJR006W	POL31	This study			POLD2	y	n
YCR014C	POL4	BioGRID			POLL	y	n
YCR014C	POL4	BioGRID			POLB	y	n
YCR014C	POL4	BioGRID			POLM	y	n
YCR014C	POL4	BioGRID			DNTT	y	n
YNR052C	POP2	BioGRID			CNOT7	y	n
YNR052C	POP2	BioGRID			CNOT8	y	n
YDL006W	PTC1	BioGRID			PPM1L	y	n
YBL056W	PTC3	BioGRID			PPM1G	y	n
YBL056W	PTC3	BioGRID			PPM1A	y	n
YBL056W	PTC3	BioGRID			PPM1B	y	n
YBL056W	PTC3	BioGRID			PPM1N	y	n
YBL056W	PTC3	BioGRID			PPM1E	y	n
YBL056W	PTC3	BioGRID			PPM1F	y	n
YML095C	RAD10	BioGRID			ERCC1	y	n
YCR066W	RAD18	BioGRID	DRYGIN		RAD18	y	n
YEL037C	RAD23	BioGRID			RAD23B	y	n
YEL037C	RAD23	BioGRID			RAD23A	y	n
YLR032W	RAD5	BioGRID			HLTF	y	n
YNL250W	RAD50	BioGRID	DRYGIN		RAD50	y	n
YER095W	RAD51	BioGRID	DRYGIN		RAD51	y	n
YER095W	RAD51	BioGRID	DRYGIN		RAD51C	y	n
YER095W	RAD51	BioGRID	DRYGIN		RAD51D	y	n
YML032C	RAD52	BioGRID	DRYGIN		RAD52	y	n
YGL163C	RAD54	BioGRID	DRYGIN		RAD54L	y	n
YGL163C	RAD54	BioGRID	DRYGIN		RAD54B	y	n
YGL163C	RAD54	BioGRID	DRYGIN		RAD54L2	y	n
YDR004W	RAD57	BioGRID	DRYGIN		XRCC3	y	n
YGL058W	RAD6	BioGRID			BIRC6	y	n
YGL058W	RAD6	BioGRID			UBE2B	y	n
YGL058W	RAD6	BioGRID			UBE2A	y	n
YGL058W	RAD6	BioGRID			UBE2Z	y	n
YGL058W	RAD6	BioGRID			UBE2O	y	n
YNL098C	RAS2	BioGRID	DRYGIN		RRAS2	y	n
YNL098C	RAS2	BioGRID	DRYGIN		RRAS	y	n
YOR285W	RDL1	DRYGIN			TSTD1	y	n
YOL080C	REX4	BioGRID	DRYGIN		REXO4	y	n
YOL080C	REX4	BioGRID	DRYGIN		ISG20L2	y	n
YOL080C	REX4	BioGRID	DRYGIN		ISG20	y	n
YOL080C	REX4	BioGRID	DRYGIN		AEN	y	n
YAR007C	RFA1	This study	BioGRID		RPA1	y	n
YNL312W	RFA2	BioGRID			RPA2	y	n
YNL312W	RFA2	BioGRID			RPA4	y	n
YOR217W	RFC1	BioGRID			RFC1	y	n
YOR217W	RFC1	BioGRID			ATAD5	y	n
YOL094C	RFC4	This study	BioGRID		RFC2	y	n
YBR087W	RFC5	This study	BioGRID	DRYGIN	RFC3	y	n
YFL033C	RIM15	BioGRID			MASTL	y	n
YPR018W	RLF2	BioGRID	DRYGIN		CHAF1A	y	n
YMR235C	RNA1	DRYGIN			RANGAP1	y	n
YNL072W	RNH201	BioGRID	DRYGIN		RNASEH2A	y	n
YDR045C	RPC11	BioGRID			POLR3K	y	n
YPR110C	RPC40	This study	BioGRID		POLR1C	y	n
YBL092W	RPL32	This study			RPL32	y	n
YHR200W	RPN10	BioGRID			PSMD4	y	n
YOR182C	RPS30B	BioGRID			FAU	y	n
YOR182C	RPS30B	BioGRID			AP000769.1	y	n
YIL153W	RRD1	BioGRID	DRYGIN		PPP2R4	y	n
YGL244W	RTF1	BioGRID	DRYGIN		RTF1	y	n
YKL212W	SAC1	BioGRID			SACM1L	y	n
YKL212W	SAC1	BioGRID			INPP5F	y	n
YER129W	SAK1	DRYGIN			CAMKK1	y	n
YER129W	SAK1	DRYGIN			CAMKK2	y	n
YDR180W	SCC2	This study	BioGRID	DRYGIN	NIPBL	y	n
YMR272C	SCS7	DRYGIN			FA2H	y	n
YMR079W	SEC14	BioGRID			SEC14L2	y	n
YMR079W	SEC14	BioGRID			SEC14L3	y	n
YMR079W	SEC14	BioGRID			SEC14L4	y	n
YMR079W	SEC14	BioGRID			SEC14L6	y	n
YMR079W	SEC14	BioGRID			SEC14L5	y	n
YMR079W	SEC14	BioGRID			SEC14L1	y	n
YLR268W	SEC22	DRYGIN			SEC22A	y	n
YLR268W	SEC22	DRYGIN			SEC22C	y	n
YJL168C	SET2	DRYGIN			EHMT2	y	n
YJL168C	SET2	DRYGIN			SUV39H1	y	n
YJL168C	SET2	DRYGIN			EHMT1	y	n
YJL168C	SET2	DRYGIN			SETDB1	y	n
YJL168C	SET2	DRYGIN			SUV39H2	y	n
YJL168C	SET2	DRYGIN			SETDB2	y	n
YMR190C	SGS1	BioGRID	DRYGIN		RECQL	y	n
YMR216C	SKY1	BioGRID	DRYGIN		SRPK3	y	n
YMR216C	SKY1	BioGRID	DRYGIN		SRPK2	y	n
YMR216C	SKY1	BioGRID	DRYGIN		SRPK1	y	n
YDR088C	SLU7	BioGRID	DRYGIN		SLU7	y	n
YFL008W	SMC1	This study	BioGRID	DRYGIN	SMC1A	y	n
YFL008W	SMC1	This study	BioGRID	DRYGIN	SMC1B	y	n
YJL074C	SMC3	This study	BioGRID	DRYGIN	SMC3	y	n
YDR510W	SMT3	This study			SUMO2	y	n
YDR510W	SMT3	This study			SUMO4	y	n
YDR510W	SMT3	This study			RP1-241P17.4	y	n
YDR510W	SMT3	This study			SUMO3	y	n
YJR104C	SOD1	BioGRID			SOD1	y	n
YJR104C	SOD1	BioGRID			CCS	y	n
YER148W	SPT15	This study			TBPL2	y	n
YER148W	SPT15	This study			TBP	y	n
YER148W	SPT15	This study			TBPL1	y	n
YDR392W	SPT3	BioGRID			SUPT3H	y	n
YNL025C	SSN8	BioGRID			CCNK	y	n
YNL025C	SSN8	BioGRID			CCNT2	y	n
YNL025C	SSN8	BioGRID			CCNL2	y	n
YNL025C	SSN8	BioGRID			CCNL1	y	n
YNL025C	SSN8	BioGRID			CCNT1	y	n
YNL025C	SSN8	BioGRID			FAM58A	y	n
YCL008C	STP22	BioGRID			TSG101	y	n
YGR002C	SWC4	BioGRID			DMAP1	y	n
YBR231C	SWC5	BioGRID			RP11-77K12.1	y	n
YBR231C	SWC5	BioGRID			CFDP1	y	n
YDR334W	SWR1	BioGRID			EP400NL	y	n
YDR334W	SWR1	BioGRID			XPO5	y	n
YDR334W	SWR1	BioGRID			GTPBP8	y	n
YDR145W	TAF12	BioGRID			TAF12	y	n
YML098W	TAF13	BioGRID			TAF13	y	n
YGL112C	TAF6	BioGRID			TAF6	y	n
YGL112C	TAF6	BioGRID			TAF6L	y	n
YMR236W	TAF9	BioGRID			TAF9	y	n
YMR236W	TAF9	BioGRID			TAF9B	y	n
YMR028W	TAP42	DRYGIN			IGBP1	y	n
YBR223C	TDP1	BioGRID	DRYGIN		TDP1	y	n
YKL081W	TEF4	BioGRID			hsa-mir-3654	y	n
YKL081W	TEF4	BioGRID			EEF1G	y	n
YCR053W	THR4	BioGRID			THNSL1	y	n
YCR053W	THR4	BioGRID			THNSL2	y	n
YNL273W	TOF1	BioGRID			TIMELESS	y	n
YDR457W	TOM1	BioGRID	DRYGIN		HUWE1	y	n
YDR457W	TOM1	BioGRID	DRYGIN		UBR5	y	n
YOL006C	TOP1	BioGRID			TOP1MT	y	n
YLR234W	TOP3	BioGRID			TOP3A	y	n
YLR234W	TOP3	BioGRID			TOP3B	y	n
YNL079C	TPM1	DRYGIN			TPM2	y	n
YNL079C	TPM1	DRYGIN			TPM1	y	n
YDR165W	TRM82	BioGRID	DRYGIN		WDR4	y	n
YML028W	TSA1	BioGRID	DRYGIN		PRDX2	y	n
YML028W	TSA1	BioGRID	DRYGIN		PRDX1	y	n
YML028W	TSA1	BioGRID	DRYGIN		PRDX4	y	n
YDR453C	TSA2	DRYGIN			PRDX2	y	n
YDR453C	TSA2	DRYGIN			PRDX1	y	n
YDR453C	TSA2	DRYGIN			PRDX4	y	n
YML124C	TUB3	BioGRID			TUBA3D	y	n
YML124C	TUB3	BioGRID			TUBA3C	y	n
YML124C	TUB3	BioGRID			TUBA3E	y	n
YML124C	TUB3	BioGRID			TUBA8	y	n
YML124C	TUB3	BioGRID			TUBAL3	y	n
YLL039C	UBI4	DRYGIN			UBBP4	y	n
YLL039C	UBI4	DRYGIN			UBB	y	n
YLL039C	UBI4	DRYGIN			UBC	y	n
YLL039C	UBI4	DRYGIN			ISG15	y	n
YLL039C	UBI4	DRYGIN			UBD	y	n
YDL122W	UBP1	DRYGIN			USP30	y	n
YBR058C	UBP14	BioGRID			USP5	y	n
YBR058C	UBP14	BioGRID			USP13	y	n
YFR010W	UBP6	BioGRID			USP14	y	n
YGR184C	UBR1	BioGRID	DRYGIN		UBR2	y	n
YGR184C	UBR1	BioGRID	DRYGIN		UBR1	y	n
YGR184C	UBR1	BioGRID	DRYGIN		UBR3	y	n
YPL020C	ULP1	BioGRID			SENP1	y	n
YPL020C	ULP1	BioGRID			SENP2	y	n
YPL020C	ULP1	BioGRID			SENP3	y	n
YPL020C	ULP1	BioGRID			SENP5	y	n
YOR191W	ULS1	DRYGIN			TTF2	y	n
YLR410W	VIP1	BioGRID	DRYGIN		PPIP5K1	y	n
YLR410W	VIP1	BioGRID	DRYGIN		PPIP5K2	y	n
YDL185W	VMA1	BioGRID	DRYGIN		ATP6V1A	y	n
YKR001C	VPS1	BioGRID			DNM1	y	n
YKR001C	VPS1	BioGRID			DNM3	y	n
YLR396C	VPS33	BioGRID			VPS33A	y	n
YLR396C	VPS33	BioGRID			VPS33B	y	n
YLR240W	VPS34	BioGRID			PIK3C3	y	n
YLR240W	VPS34	BioGRID			PIK3C2B	y	n
YLR240W	VPS34	BioGRID			PIK3C2A	y	n
YLR240W	VPS34	BioGRID			PIK3C2G	y	n
YPR173C	VPS4	DRYGIN			VPS4A	y	n
YPR173C	VPS4	DRYGIN			VPS4B	y	n
YPR173C	VPS4	DRYGIN			KATNA1	y	n
YPR173C	VPS4	DRYGIN			KATNAL1	y	n
YPR173C	VPS4	DRYGIN			KATNAL2	y	n
YDR080W	VPS41	BioGRID			VPS41	y	n
YOR069W	VPS5	BioGRID			SNX2	y	n
YOR069W	VPS5	BioGRID			SNX1	y	n
YOR069W	VPS5	BioGRID			SNX32	y	n
YOR069W	VPS5	BioGRID			SNX6	y	n
YOR069W	VPS5	BioGRID			SNX5	y	n
YNL107W	YAF9	BioGRID			YEATS4	y	n
YNL107W	YAF9	BioGRID			YEATS2	y	n
YNL064C	YDJ1	BioGRID			DNAJA2	y	n
YNL064C	YDJ1	BioGRID			DNAJA1	y	n
YNL064C	YDJ1	BioGRID			DNAJA4	y	n
YNL064C	YDJ1	BioGRID			DNAJB11	y	n
YNL092W	YNL092W	DRYGIN			C9orf41	y	n
YGR270W	YTA7	BioGRID	DRYGIN		ATAD2B	y	n
YGR270W	YTA7	BioGRID	DRYGIN		ATAD2	y	n
YBL016W	FUS3	BioGRID			MAPK3	n	n
YOL012C	HTZ1	BioGRID			H2AFZ	n	n
YNL147W	LSM7	BioGRID			LSM7	n	n
YJR074W	MOG1	BioGRID			RANGRF	n	n
YPR131C	NAT3	BioGRID			NAA20	n	n
YLR350W	ORM2	BioGRID			ORMDL3	n	n
YLR350W	ORM2	BioGRID			ORMDL2	n	n
YOL115W	PAP2	BioGRID			PAPD5	n	n
YJL128C	PBS2	BioGRID	DRYGIN		MAP2K2	n	n
YJL128C	PBS2	BioGRID	DRYGIN		MAP2K3	n	n
YML061C	PIF1	BioGRID			PIF1	n	n
YDL006W	PTC1	BioGRID			PPM1K	n	n
YER173W	RAD24	BioGRID	DRYGIN		RAD17	n	n
YGL058W	RAD6	BioGRID			UBE2S	n	n
YHR010W	RPL27A	BioGRID			RPL27	n	n
YHL015W	RPS20	This study			RPS20	n	n
YMR079W	SEC14	BioGRID			RP4-539M6.19	n	n
YKR072C	SIS2	BioGRID	DRYGIN		PPCDC	n	n
YDR510W	SMT3	This study			SUMO1	n	n
YPL002C	SNF8	BioGRID			SNF8	n	n
YJR104C	SOD1	BioGRID			SOD3	n	n
YNL025C	SSN8	BioGRID			CCNC	n	n
YML028W	TSA1	BioGRID	DRYGIN		PRDX3	n	n
YDR453C	TSA2	DRYGIN			PRDX3	n	n
YOR054C	VHS3	DRYGIN			PPCDC	n	n
YLR396C	VPS33	BioGRID			RP11-512M8.5	n	n
YPR173C	VPS4	DRYGIN			RP11-343C2.3	n	n
YBR100W	DNE*	DRYGIN
YCL060C	DNE*	DRYGIN
YML102C-A	DNE*	DRYGIN
YGL071W	AFT1	BioGRID			#N/A	#N/A	#N/A
YGL160W	AIM14	DRYGIN			#N/A	#N/A	#N/A
YBL009W	ALK2	BioGRID			#N/A	#N/A	#N/A
YEL036C	ANP1	BioGRID	DRYGIN		#N/A	#N/A	#N/A
YNL094W	APP1	BioGRID	DRYGIN		#N/A	#N/A	#N/A
YLR015W	BRE2	BioGRID			#N/A	#N/A	#N/A
YDR275W	BSC2	DRYGIN			#N/A	#N/A	#N/A
YOR026W	BUB3	BioGRID	DRYGIN		#N/A	#N/A	#N/A
YFL023W	BUD27	BioGRID			#N/A	#N/A	#N/A
YLR353W	BUD8	BioGRID	DRYGIN		#N/A	#N/A	#N/A
YMR038C	CCS1	BioGRID			#N/A	#N/A	#N/A
YDL220C	CDC13	BioGRID			#N/A	#N/A	#N/A
YFL009W	CDC4	BioGRID			#N/A	#N/A	#N/A
YPL228W	CET1	DRYGIN			#N/A	#N/A	#N/A
YMR198W	CIK1	BioGRID	DRYGIN		#N/A	#N/A	#N/A
YGL019W	CKB1	DRYGIN			#N/A	#N/A	#N/A
YGR167W	CLC1	BioGRID			#N/A	#N/A	#N/A
YMR199W	CLN1	BioGRID			#N/A	#N/A	#N/A
YPL256C	CLN2	BioGRID			#N/A	#N/A	#N/A
YNR010W	CSE2	BioGRID	DRYGIN		#N/A	#N/A	#N/A
YCR086W	CSM1	BioGRID	DRYGIN		#N/A	#N/A	#N/A
YIL132C	CSM2	BioGRID			#N/A	#N/A	#N/A
YMR048W	CSM3	BioGRID			#N/A	#N/A	#N/A
YHR191C	CTF8	BioGRID			#N/A	#N/A	#N/A
YJL006C	CTK2	BioGRID			#N/A	#N/A	#N/A
YML112W	CTK3	BioGRID			#N/A	#N/A	#N/A
YPL194W	DDC1	BioGRID	DRYGIN		#N/A	#N/A	#N/A
YOR080W	DIA2	BioGRID			#N/A	#N/A	#N/A
YDR359C	EAF1	BioGRID	DRYGIN		#N/A	#N/A	#N/A
YEL018W	EAF5	BioGRID			#N/A	#N/A	#N/A
YJR082C	EAF6	DRYGIN			#N/A	#N/A	#N/A
YDR206W	EBS1	DRYGIN			#N/A	#N/A	#N/A
YLR436C	ECM30	DRYGIN			#N/A	#N/A	#N/A
YOR144C	ELG1	BioGRID	DRYGIN		#N/A	#N/A	#N/A
YPL096C-A	ERI1	DRYGIN			#N/A	#N/A	#N/A
YDR363W	ESC2	BioGRID			#N/A	#N/A	#N/A
YLR233C	EST1	BioGRID			#N/A	#N/A	#N/A
YNR047W	FPK1	BioGRID			#N/A	#N/A	#N/A
YOR324C	FRT1	DRYGIN			#N/A	#N/A	#N/A
YDR024W	FYV1	DRYGIN			#N/A	#N/A	#N/A
YOR183W	FYV12	DRYGIN			#N/A	#N/A	#N/A
YMR307W	GAS1	BioGRID	DRYGIN		#N/A	#N/A	#N/A
YGL020C	GET1	BioGRID	DRYGIN		#N/A	#N/A	#N/A
YER083C	GET2	BioGRID	DRYGIN		#N/A	#N/A	#N/A
YBL032W	HEK2	BioGRID			#N/A	#N/A	#N/A
YER052C	HOM3	DRYGIN			#N/A	#N/A	#N/A
YJR139C	HOM6	DRYGIN			#N/A	#N/A	#N/A
YBR215W	HPC2	BioGRID			#N/A	#N/A	#N/A
YOR025W	HST3	BioGRID	DRYGIN		#N/A	#N/A	#N/A
YGR223C	HSV2	DRYGIN			#N/A	#N/A	#N/A
YOR284W	HUA2	BioGRID	DRYGIN		#N/A	#N/A	#N/A
YGL168W	HUR1	BioGRID	DRYGIN		#N/A	#N/A	#N/A
YNL215W	IES2	BioGRID			#N/A	#N/A	#N/A
YIL154C	IMP2'	BioGRID	DRYGIN		#N/A	#N/A	#N/A
YDR315C	IPK1	BioGRID	DRYGIN		#N/A	#N/A	#N/A
YDL115C	IWR1	BioGRID	DRYGIN		#N/A	#N/A	#N/A
YGL016W	KAP122	BioGRID			#N/A	#N/A	#N/A
YLR096W	KIN2	BioGRID	DRYGIN		#N/A	#N/A	#N/A
YPL055C	LGE1	BioGRID	DRYGIN		#N/A	#N/A	#N/A
YDR439W	LRS4	BioGRID			#N/A	#N/A	#N/A
YDR378C	LSM6	BioGRID			#N/A	#N/A	#N/A
YAL024C	LTE1	BioGRID			#N/A	#N/A	#N/A
YDL003W	MCD1	BioGRID	DRYGIN		#N/A	#N/A	#N/A
YNL307C	MCK1	BioGRID	DRYGIN		#N/A	#N/A	#N/A
YOR147W	MDM32	BioGRID			#N/A	#N/A	#N/A
YGL219C	MDM34	BioGRID			#N/A	#N/A	#N/A
YLR288C	MEC3	BioGRID	DRYGIN		#N/A	#N/A	#N/A
YPR070W	MED1	BioGRID	DRYGIN		#N/A	#N/A	#N/A
YPR164W	MMS1	BioGRID	DRYGIN		#N/A	#N/A	#N/A
YLR320W	MMS22	BioGRID	DRYGIN		#N/A	#N/A	#N/A
YBR098W	MMS4	BioGRID	DRYGIN		#N/A	#N/A	#N/A
YIR025W	MND2	BioGRID			#N/A	#N/A	#N/A
YDR245W	MNN10	BioGRID			#N/A	#N/A	#N/A
YCL061C	MRC1	BioGRID	DRYGIN		#N/A	#N/A	#N/A
YML009C	MRPL39	DRYGIN			#N/A	#N/A	#N/A
YBR195C	MSI1	BioGRID	DRYGIN		#N/A	#N/A	#N/A
YOR209C	NPT1	BioGRID			#N/A	#N/A	#N/A
YNL251C	NRD1	This study			#N/A	#N/A	#N/A
YDL167C	NRP1	BioGRID			#N/A	#N/A	#N/A
YKL057C	NUP120	BioGRID			#N/A	#N/A	#N/A
YKR082W	NUP133	BioGRID	DRYGIN		#N/A	#N/A	#N/A
YAR002W	NUP60	BioGRID	DRYGIN		#N/A	#N/A	#N/A
YNL099C	OCA1	DRYGIN			#N/A	#N/A	#N/A
YGR179C	OKP1	This study			#N/A	#N/A	#N/A
YPR044C	OPI11	DRYGIN			#N/A	#N/A	#N/A
YLL004W	ORC3	This study	BioGRID	DRYGIN	#N/A	#N/A	#N/A
YDL173W	PAR32	DRYGIN			#N/A	#N/A	#N/A
YDR542W	PAU10	BioGRID	DRYGIN		#N/A	#N/A	#N/A
YBL005W	PDR3	BioGRID	DRYGIN		#N/A	#N/A	#N/A
YMR231W	PEP5	BioGRID			#N/A	#N/A	#N/A
YGL023C	PIB2	DRYGIN			#N/A	#N/A	#N/A
YGL008C	PMA1	BioGRID	DRYGIN		#N/A	#N/A	#N/A
YJR043C	POL32	BioGRID	DRYGIN		#N/A	#N/A	#N/A
YDR075W	PPH3	BioGRID	DRYGIN		#N/A	#N/A	#N/A
YLR376C	PSY3	BioGRID	DRYGIN		#N/A	#N/A	#N/A
YOR368W	RAD17	BioGRID	DRYGIN		#N/A	#N/A	#N/A
YDR076W	RAD55	BioGRID	DRYGIN		#N/A	#N/A	#N/A
YDL059C	RAD59	BioGRID	DRYGIN		#N/A	#N/A	#N/A
YDR014W	RAD61	BioGRID			#N/A	#N/A	#N/A
YDR217C	RAD9	BioGRID	DRYGIN		#N/A	#N/A	#N/A
YNL216W	RAP1	This study	BioGRID	DRYGIN	#N/A	#N/A	#N/A
YBR073W	RDH54	BioGRID			#N/A	#N/A	#N/A
YDL001W	RMD1	BioGRID	DRYGIN		#N/A	#N/A	#N/A
YGL107C	RMD9	BioGRID			#N/A	#N/A	#N/A
YPL024W	RMI1	BioGRID			#N/A	#N/A	#N/A
YDR279W	RNH202	BioGRID	DRYGIN		#N/A	#N/A	#N/A
YLR154C	RNH203	BioGRID	DRYGIN		#N/A	#N/A	#N/A
YNL113W	RPC19	BioGRID	DRYGIN		#N/A	#N/A	#N/A
YDL020C	RPN4	BioGRID	DRYGIN		#N/A	#N/A	#N/A
YPR116W	RRG8	BioGRID			#N/A	#N/A	#N/A
YJL047C	RTT101	BioGRID			#N/A	#N/A	#N/A
YER104W	RTT105	BioGRID			#N/A	#N/A	#N/A
YNL206C	RTT106	BioGRID			#N/A	#N/A	#N/A
YHR154W	RTT107	BioGRID	DRYGIN		#N/A	#N/A	#N/A
YLL002W	RTT109	BioGRID	DRYGIN		#N/A	#N/A	#N/A
YDR388W	RVS167	BioGRID			#N/A	#N/A	#N/A
YDR389W	SAC7	BioGRID			#N/A	#N/A	#N/A
YGL175C	SAE2	BioGRID	DRYGIN		#N/A	#N/A	#N/A
YCR008W	SAT4	DRYGIN			#N/A	#N/A	#N/A
YKL117W	SBA1	BioGRID			#N/A	#N/A	#N/A
YHR103W	SBE22	DRYGIN			#N/A	#N/A	#N/A
YIL084C	SDS3	DRYGIN			#N/A	#N/A	#N/A
YHL006C	SHU1	DRYGIN			#N/A	#N/A	#N/A
YHR206W	SKN7	BioGRID			#N/A	#N/A	#N/A
YLR135W	SLX4	BioGRID	DRYGIN		#N/A	#N/A	#N/A
YDL013W	SLX5	BioGRID			#N/A	#N/A	#N/A
YER116C	SLX8	BioGRID			#N/A	#N/A	#N/A
YGR081C	SLX9	BioGRID			#N/A	#N/A	#N/A
YGR229C	SMI1	BioGRID			#N/A	#N/A	#N/A
YMR179W	SPT21	BioGRID			#N/A	#N/A	#N/A
YJL092W	SRS2	BioGRID	DRYGIN		#N/A	#N/A	#N/A
YDR293C	SSD1	BioGRID			#N/A	#N/A	#N/A
YLR006C	SSK1	DRYGIN			#N/A	#N/A	#N/A
YHR064C	SSZ1	BioGRID			#N/A	#N/A	#N/A
YNL309W	STB1	DRYGIN			#N/A	#N/A	#N/A
YCL032W	STE50	DRYGIN			#N/A	#N/A	#N/A
YDL130W-A	STF1	BioGRID	DRYGIN		#N/A	#N/A	#N/A
YDR310C	SUM1	BioGRID			#N/A	#N/A	#N/A
YBR111W-A	SUS1	BioGRID	DRYGIN		#N/A	#N/A	#N/A
YLR182W	SWI6	BioGRID			#N/A	#N/A	#N/A
YDR260C	SWM1	BioGRID			#N/A	#N/A	#N/A
YNL081C	SWS2	BioGRID	DRYGIN		#N/A	#N/A	#N/A
YMR005W	TAF4	BioGRID			#N/A	#N/A	#N/A
YML114C	TAF8	BioGRID	DRYGIN		#N/A	#N/A	#N/A
YOR192C	THI72	DRYGIN			#N/A	#N/A	#N/A
YOL072W	THP1	BioGRID			#N/A	#N/A	#N/A
YOR295W	UAF30	BioGRID			#N/A	#N/A	#N/A
YDR207C	UME6	BioGRID			#N/A	#N/A	#N/A
YNL054W	VAC7	BioGRID			#N/A	#N/A	#N/A
YOR106W	VAM3	DRYGIN			#N/A	#N/A	#N/A
YDR495C	VPS3	BioGRID			#N/A	#N/A	#N/A
YAL002W	VPS8	BioGRID			#N/A	#N/A	#N/A
YOR083W	WHI5	BioGRID	DRYGIN		#N/A	#N/A	#N/A
YJR133W	XPT1	DRYGIN			#N/A	#N/A	#N/A
YDR369C	XRS2	BioGRID	DRYGIN		#N/A	#N/A	#N/A
YML007W	YAP1	BioGRID			#N/A	#N/A	#N/A
YBL081W	YBL081W	BioGRID			#N/A	#N/A	#N/A
YBR099C	YBR099C	DRYGIN			#N/A	#N/A	#N/A
YBR224W	YBR224W	DRYGIN			#N/A	#N/A	#N/A
YDL162C	YDL162C	DRYGIN			#N/A	#N/A	#N/A
YDR157W	YDR157W	DRYGIN			#N/A	#N/A	#N/A
YDR306C	YDR306C	BioGRID	DRYGIN		#N/A	#N/A	#N/A
YGR026W	YGR026W	DRYGIN			#N/A	#N/A	#N/A
YGR039W	YGR039W	DRYGIN			#N/A	#N/A	#N/A
YGR053C	YGR053C	BioGRID	DRYGIN		#N/A	#N/A	#N/A
YGR259C	YGR259C	DRYGIN			#N/A	#N/A	#N/A
YKL069W	YKL069W	BioGRID			#N/A	#N/A	#N/A
YLL054C	YLL054C	DRYGIN			#N/A	#N/A	#N/A
YLR036C	YLR036C	DRYGIN			#N/A	#N/A	#N/A
YLR317W	YLR317W	This study			#N/A	#N/A	#N/A
YLR352W	YLR352W	BioGRID			#N/A	#N/A	#N/A
YNL108C	YNL108C	DRYGIN			#N/A	#N/A	#N/A
YNL109W	YNL109W	DRYGIN			#N/A	#N/A	#N/A
YNL115C	YNL115C	DRYGIN			#N/A	#N/A	#N/A
YNL260C	YNL260C	This study			#N/A	#N/A	#N/A
YOR024W	YOR024W	DRYGIN			#N/A	#N/A	#N/A
YOR082C	YOR082C	DRYGIN			#N/A	#N/A	#N/A
YOR218C	YOR218C	This study			#N/A	#N/A	#N/A
YPL150W	YPL150W	BioGRID	DRYGIN		#N/A	#N/A	#N/A
YPR078C	YPR078C	BioGRID	DRYGIN		#N/A	#N/A	#N/A
Notes and References
1Stark C, Breitkreutz BJ, Reguly T, Boucher L, Breitkreutz A, Tyers M. BioGRID: a general repository for interaction datasets. 2006. Nucleic Acids Res 34:D535-539.
2Koh JL, Ding H, Costanzo M, Baryshnikova A, Toufighi K, Bader GD, Myers CL, Andrews BJ, Boone C. DRYGIN: a database of quantitative genetic interaction networks in yeast. 2010. Nucleic Acids Res 38:D502-507.
*DNE = Does not exist.
